# Supplementary material for: Alleviation of cold stress impacts on grapes by the chitosan-salicylic acid nanocomposite (CS-SA NCs) application
Source: PeerJ. 2025 Dec 11;13:e20368. doi: 10.7717/peerj.20368 (PMC12702306; doi:10.7717/peerj.20368)
Supplement: Supplemental Information 1 [file peerj-13-20368-s001.xlsx]

## Sheet: Sheet1
			EL	Chl a	Chl b	Total Chl	Car	CAT	APX	pro	GPX	SOD	GR	MDA	H2O2	AsA	DHA	AsA/DHA	GSH	GSSG	GSH/GSSG
Tep	SA-Ch	Rep	X1	X2	X3	X4	X5	X6	X7	X8	X9	X10	X11	X12	X13	X14	X15	X16	X17	X18	X19
1	1	1	18.51	11.59	5.48	17.07	1.42	0.115	0.106	0.045	0.177	27.98	0.105	51.15	0.148	0.1365	0.25	0.546	3.979	1.31	3.0374
1	1	2	13.5	11.26	5.51	16.77	1.51	0.112	0.143	0.037	0.157	29.67	0.11567	58.46	0.158	0.129	0.23	0.56087	3.9445	1.23	3.20691
1	1	3	14.25	10.71	4.45	15.16	1.53	0.069	0.196	0.051	0.345	29.82	0.09367	55.23	0.151	0.1425	0.23	0.619565	3.8985	1.29	3.02209
1	1	4	13.01	11.37	4.46	15.83	1.51	0.103	0.193	0.068	0.398	34.25	0.11	51.13	0.167	0.138	0.24	0.575	3.864	1.3	2.97231
1	2	1	18.33	11.81	5.56	17.37	1.43	0.137	0.138	0.045	0.488	37.33	0.17002	38.89	0.128	0.1575	0.39	0.403846	4.1055	1.13	3.63319
1	2	2	20.33	11.78	5.58	17.36	1.52	0.228	0.302	0.042	0.408	35.78	0.22062	32.18	0.114	0.1665	0.36	0.4625	4.3125	1.21	3.56405
1	2	3	18.81	11.85	4.95	16.8	1.55	0.099	0.376	0.045	0.53	37.65	0.18549	31.89	0.124	0.1635	0.37	0.441892	4.232	1.21	3.49752
1	2	4	15.56	11.82	5.07	16.89	1.53	0.106	0.256	0.043	0.524	37.92	0.25845	45.18	0.112	0.177	0.39	0.453846	4.485	1.22	3.67623
1	3	1	17.21	12.38	5.83	18.21	1.56	0.349	0.177	0.066	0.646	39.12	0.33789	25.18	0.099	0.231	0.41	0.563415	6.072	1.03	5.89515
1	3	2	22.65	12.28	5.79	18.07	1.56	0.256	0.266	0.044	0.69	38.83	0.18103	22.56	0.11	0.2265	0.43	0.526744	6.3135	1.03	6.12961
1	3	3	18.51	12.35	4.98	17.33	1.45	0.378	0.286	0.047	0.768	39.74	0.38994	28.23	0.105	0.2325	0.41	0.567073	6.3365	1.13	5.60752
1	3	4	20.35	12.34	5.23	17.57	1.54	0.363	0.278	0.084	0.778	38.34	0.27848	25.98	0.101	0.2295	0.42	0.546429	6.026	1.12	5.38036
1	4	1	16.65	12.68	5.89	18.57	1.76	0.173	0.092	0.073	0.339	22.27	0.13	18.26	0.06	0.2415	0.5	0.483	6.3135	1.09	5.7922
1	4	2	17.52	12.79	5.91	18.7	1.66	0.164	0.117	0.094	0.288	18.35	0.132	15.98	0.052	0.2355	0.45	0.523333	6.509	1.09	5.97156
1	4	3	18.65	12.62	5.88	18.5	1.71	0.161	0.043	0.092	0.292	23.07	0.128	10.18	0.045	0.246	0.48	0.5125	6.2905	0.95	6.62158
1	4	4	19.35	12.68	5.85	18.53	1.66	0.149	0.073	0.068	0.328	20.44	0.13907	11.56	0.048	0.24	0.486	0.493827	6.578	0.96	6.85208
2	1	1	20.45	11.01	4.88	15.89	1.44	0.302	0.253	0.077	0.866	35.78	0.249	79.56	0.296	0.1275	0.33	0.386364	3.473	1.38	2.51667
2	1	2	26.23	10.29	4.1	14.39	1.51	0.304	0.278	0.074	0.815	39.74	0.235	80.75	0.275	0.1215	0.34	0.357353	3.5075	1.46	2.4024
2	1	3	20.54	10.42	4.17	14.59	1.48	0.227	0.234	0.063	0.745	32.65	0.23	86.97	0.285	0.132	0.33	0.4	3.427	1.49	2.3
2	1	4	21.87	10.36	4.12	14.48	1.52	0.366	0.308	0.059	0.913	32.65	0.242	89.97	0.359	0.126	0.35	0.36	3.4615	1.47	2.35476
2	2	1	24.18	11.26	5.18	16.44	1.52	0.387	0.411	0.066	1.132	36.56	0.345678	56.35	0.194	0.1515	0.41	0.369512	4.1515	1.25	3.3212
2	2	2	19.21	12.27	5.16	17.43	1.56	0.32	0.375	0.071	0.906	39.74	0.35663	67.24	0.175	0.159	0.42	0.378571	3.9675	1.14	3.48026
2	2	3	18.71	11.25	4.44	15.69	1.54	0.341	0.348	0.077	1.674	39.45	0.29467	52.98	0.185	0.1485	0.43	0.345349	4.1285	1.16	3.55905
2	2	4	20.88	11.18	4.23	15.41	1.52	0.318	0.423	0.087	0.976	37.43	0.26789	64.36	0.169	0.1545	0.43	0.359302	3.933	1.26	3.12143
2	3	1	25.32	11.29	5.23	16.52	1.53	0.455	0.316	0.063	1.714	46.25	0.36778	30.23	0.13	0.2025	0.44	0.460227	5.2095	1.19	4.37773
2	3	2	18.54	11.38	5.22	16.6	1.58	0.545	0.312	0.059	1.298	39.85	0.35647	32.08	0.129	0.1965	0.47	0.418085	5.336	1.08	4.94074
2	3	3	21.58	11.4	4.54	15.94	1.53	0.656	0.316	0.076	1.288	44.32	0.44638	41.68	0.118	0.207	0.45	0.46	5.405	1.08	5.00463
2	3	4	20.92	11.52	4.49	16.01	1.56	0.753	0.233	0.068	1.377	37.92	0.43578	39.58	0.125	0.204	0.44	0.463636	5.4165	1.09	4.96927
2	4	1	18.35	12.26	5.27	17.53	1.54	0.314	0.174	0.044	0.522	33.47	0.217	27.91	0.084	0.2085	0.53	0.393396	5.428	1.11	4.89009
2	4	2	13.25	12.05	5.32	17.37	1.68	0.298	0.107	0.075	0.687	36.81	0.21	20.96	0.086	0.2115	0.53	0.399057	5.428	1.11	4.89009
2	4	3	14.43	11.96	5.28	17.24	1.58	0.31	0.177	0.053	0.486	31.87	0.222	21.33	0.075	0.2055	0.52	0.395192	5.6925	1.01	5.63614
2	4	4	27.26	12.16	5.12	17.28	1.74	0.303	0.136	0.029	0.569	24.82	0.214	26.35	0.072	0.2385	0.54	0.441667	5.6235	1.03	5.45971
3	1	1	41.21	9.89	3.99	13.88	1.49	0.376	0.185	0.026	1.037	36.26	0.26741	99.48	0.495	0.1275	0.38	0.335526	3.2775	1.65	1.98636
3	1	2	30.87	9.27	3.85	13.12	1.5	0.305	0.291	0.037	1.068	39.51	0.27846	100.71	0.504	0.1395	0.39	0.357692	3.174	1.67	1.9006
3	1	3	35.26	9.39	3.84	13.23	1.48	0.216	0.277	0.035	0.976	37.92	0.26	105.78	0.429	0.1425	0.4	0.35625	3.1165	1.63	1.91196
3	1	4	31.85	9.44	3.9	13.34	1.47	0.411	0.276	0.053	1.11	40.58	0.272	98.26	0.51	0.147	0.4	0.3675	3.312	1.64	2.01951
3	2	1	22.89	9.68	4.51	14.19	1.49	0.583	0.387	0.066	1.132	42.34	0.41886	75.24	0.301	0.1515	0.46	0.329348	4.094	1.38	2.96667
3	2	2	25.65	10.37	4.29	14.66	1.5	0.406	0.439	0.097	1.121	37.35	0.37884	82.78	0.31	0.1695	0.45	0.376667	4.117	1.41	2.91986
3	2	3	24.89	10.19	4.12	14.31	1.5	0.531	0.366	0.087	1.51	39.82	0.40492	74.85	0.292	0.1635	0.45	0.363333	3.91	1.46	2.67808
3	2	4	28.41	10.39	3.99	14.38	1.55	0.413	0.354	0.082	1.247	40.76	0.394782	88.45	0.286	0.168	0.44	0.381818	3.818	1.49	2.56242
3	3	1	22.11	10.66	4.98	15.64	1.63	0.767	0.318	0.078	2.257	41.83	0.42568	54.16	0.199	0.2115	0.49	0.431633	4.968	1.13	4.39646
3	3	2	19.65	10.7	4.91	15.61	1.58	0.569	0.221	0.065	1.177	51.09	0.49567	61.36	0.186	0.2175	0.47	0.462766	4.7495	1.15	4.13
3	3	3	20.55	10.51	4.21	14.72	1.72	0.751	0.278	0.062	1.564	49.74	0.51672	64.59	0.205	0.213	0.48	0.44375	5.0485	1.24	4.07137
3	3	4	21.96	10.89	4.03	14.92	1.57	0.651	0.199	0.064	1.885	47.87	0.48603	59.87	0.193	0.2085	0.46	0.453261	4.7725	1.21	3.94421
3	4	1	22.18	11.28	5.01	16.29	1.67	0.584	0.109	0.106	0.984	35.07	0.25	34.27	0.128	0.2235	0.55	0.406364	5.037	1.19	4.23277
3	4	2	25.33	11.31	5.03	16.34	1.72	0.575	0.152	0.071	0.897	36.26	0.249	39.56	0.111	0.222	0.55	0.403636	5.0025	1.18	4.23941
3	4	3	20.78	11.08	4.94	16.02	1.98	0.475	0.156	0.101	0.866	26.81	0.256	30.89	0.125	0.2205	0.53	0.416038	5.3015	1.07	4.95467
3	4	4	20.75	11.01	4.18	15.19	1.83	0.599	0.087	0.08	0.855	32.11	0.243	36.56	0.119	0.225	0.56	0.401786	5.2785	1.1	4.79864
4	1	1	55.17	8.59	3.53	12.12	1.47	0.173	0.076	0.03	0.832	33.07	0.197	110.65	0.636	0.0915	0.42	0.217857	2.6795	1.87	1.43289
4	1	2	43.36	8.95	3.53	12.48	1.42	0.208	0.056	0.037	0.707	34.82	0.21	114.39	0.678	0.093	0.41	0.226829	2.5185	1.88	1.33963
4	1	3	51.78	8.85	3.45	12.3	1.45	0.203	0.073	0.044	0.675	32.65	0.16288	109.79	0.691	0.096	0.43	0.223256	2.5875	1.86	1.39113
4	1	4	45.25	8.87	3.48	12.35	1.48	0.313	0.073	0.068	0.765	34.65	0.178498	118.58	0.642	0.0885	0.44	0.201136	2.691	1.87	1.43904
4	2	1	44.75	9.92	3.61	13.53	1.48	0.293	0.187	0.101	0.755	35.29	0.25647	94.86	0.498	0.1155	0.47	0.245745	3.381	1.45	2.33172
4	2	2	35.33	8.89	3.91	12.8	1.49	0.29	0.186	0.057	1.008	37.89	0.28306	102.69	0.509	0.114	0.51	0.223529	3.3465	1.55	2.15903
4	2	3	41.56	9.95	3.74	13.69	1.48	0.287	0.275	0.077	0.875	36.58	0.25788	104.45	0.498	0.1125	0.5	0.225	3.404	1.56	2.18205
4	2	4	32.78	8.92	3.54	12.46	1.49	0.286	0.177	0.057	0.772	41.59	0.24289	102.86	0.512	0.114	0.47	0.242553	3.2775	1.54	2.12825
4	3	1	31.65	10.06	3.65	13.71	1.55	0.567	0.185	0.088	0.765	43.89	0.35679	86.48	0.248	0.1515	0.48	0.315625	4.577	1.16	3.94569
4	3	2	28.77	10.07	4.12	14.19	1.69	0.437	0.123	0.054	1.009	47.25	0.35783	90.48	0.241	0.168	0.49	0.342857	4.5885	1.15	3.99
4	3	3	31.25	9.04	3.62	12.66	1.71	0.427	0.187	0.077	0.987	40.92	0.34518	92.47	0.259	0.1635	0.5	0.327	4.4965	1.17	3.84316
4	3	4	33.91	10.08	3.83	13.91	1.53	0.427	0.179	0.052	0.89	42.09	0.39678	89.07	0.238	0.168	0.51	0.329412	4.531	1.06	4.27453
4	4	1	35.78	10.072	3.74	13.812	1.71	0.254	0.092	0.068	0.454	29.35	0.20246	42.69	0.153	0.177	0.54	0.327778	5.014	1.22	4.10984
4	4	2	38.45	10.05	4.59	14.64	1.88	0.273	0.072	0.098	0.478	27.4	0.20138	49.67	0.148	0.1755	0.56	0.313393	5.037	1.22	4.12869
4	4	3	34.56	9.06	4.64	13.7	2.02	0.276	0.043	0.075	0.483	23.85	0.191	43.59	0.159	0.1755	0.56	0.313393	4.8875	1.13	4.32522
4	4	4	32.89	10.12	3.93	14.05	1.95	0.268	0.085	0.081	0.464	27.27	0.198	40.96	0.16	0.1785	0.55	0.324545	4.7955	1.11	4.32027
5	1	1	60.18	7.61	3.27	10.88	1.44	0.197	0.058	0.011	0.615	17.37	0.143	135.36	0.793	0.084	0.49	0.171429	2.208	2.07	1.06667
5	1	2	55.23	8.33	3.18	11.51	1.41	0.141	0.038	0.011	0.607	27.65	0.154	130.72	0.765	0.078	0.47	0.165957	2.231	2.06	1.08301
5	1	3	58.75	7.53	3.25	10.78	1.43	0.123	0.045	0.011	0.66	21.36	0.139	127.86	0.806	0.0885	0.49	0.180612	2.2425	2.05	1.0939
5	1	4	58.45	7.55	3.19	10.74	1.39	0.185	0.013	0.008	0.568	17.46	0.12578	134.07	0.812	0.0855	0.48	0.178125	2.0815	2.08	1.00072
5	2	1	40.18	8.61	3.38	11.99	1.53	0.245	0.123	0.031	0.658	30.58	0.19789	116.48	0.701	0.102	0.53	0.192453	3.0475	1.62	1.88117
5	2	2	45.87	7.83	3.65	11.48	1.45	0.212	0.167	0.033	0.768	39.08	0.24391	119.78	0.678	0.0915	0.562	0.162811	2.921	1.73	1.68844
5	2	3	38.92	8.63	3.55	12.18	1.48	0.255	0.167	0.033	0.53	32.92	0.19637	122.97	0.698	0.111	0.54	0.205556	2.8175	1.74	1.61925
5	2	4	46.88	8.56	3.28	11.84	1.44	0.235	0.148	0.034	0.832	40.59	0.17845	120.09	0.689	0.1005	0.52	0.193269	2.852	1.7	1.67765
5	3	1	31.62	8.81	3.45	12.26	1.58	0.433	0.098	0.011	0.68	38.79	0.23725	111.78	0.325	0.144	0.58	0.248276	4.4965	1.21	3.71612
5	3	2	39.62	8.89	4.08	12.97	1.55	0.389	0.109	0.013	0.789	46.28	0.24804	109.97	0.346	0.1365	0.584	0.233733	4.4735	1.21	3.69711
5	3	3	35.45	8.8	3.56	12.36	1.59	0.398	0.129	0.021	0.862	33.48	0.256483	112.35	0.451	0.1545	0.57	0.271053	4.278	1.3	3.29077
5	3	4	36.78	8.88	3.4	12.28	1.52	0.421	0.143	0.032	0.849	30.98	0.32916	107.96	0.472	0.1425	0.56	0.254464	4.4275	1.22	3.6291
5	4	1	32.33	8.89	3.63	12.52	1.68	0.199	0.089	0.038	0.398	20.79	0.156738	52.69	0.234	0.1575	0.61	0.258197	4.7725	1.09	4.37844
5	4	2	32.22	9.06	4.39	13.45	1.68	0.188	0.086	0.036	0.402	22.18	0.152	59.36	0.209	0.1515	0.62	0.244355	4.853	1.19	4.07815
5	4	3	30.89	9.59	4.47	14.06	1.65	0.182	0.039	0.034	0.428	20.89	0.168	60.48	0.273	0.159	0.61	0.260656	4.784	1.28	3.7375
5	4	4	38.21	9.83	3.53	13.36	1.53	0.201	0.095	0.027	0.382	22.22	0.17	50.12	0.132	0.162	0.62	0.26129	4.692	1.29	3.63721
				متغیر
			Replication	rep	4	1,2,3,4
			Temperature	temp	5	C, 1,4,8,16	Hour		C=22 degree centigrade		cold stress=+1 degree centigrade
			Chitosan-salycilic acid nanocamposite	SA-CH	4	C,1,6,12		Foliar treatment time
				1
				2
				3
